# Supplementary material
Source: PubMed Central journal article supplement (PMC2798324)
Supplement: tpc.108.064139_1.pdf [file tpc.108.064139_1.pdf]

Supplemental Data. Guo et al., (2009) *HCA2*, a Dof transcription factor gene, regulates interfascicular cambium formation and vascular tissue development in *Arabidopsis*

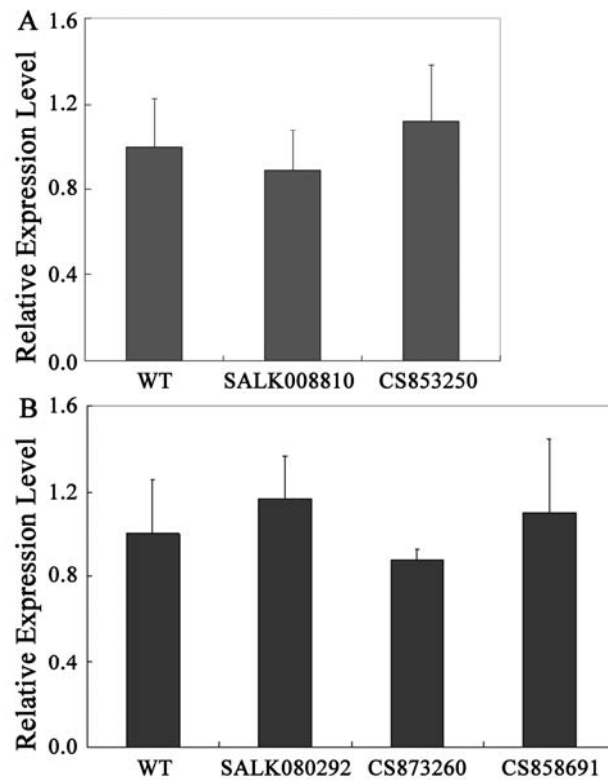

**Supplemental Figure 1. The expression level of *HCA2* and *At5g60200* was not altered in their corresponding SALK mutants**

Expression level of *HCA2* in WT, SALK008810 and CS853250 (A) or that of *At5g60200* in WT, SALK080292, CS873260 and CS858691 (B) was examined by quantitative RT-PCR analysis. The expression levels of each gene in WT are set to 1.0 and error bars represent SD of three biological replicates.

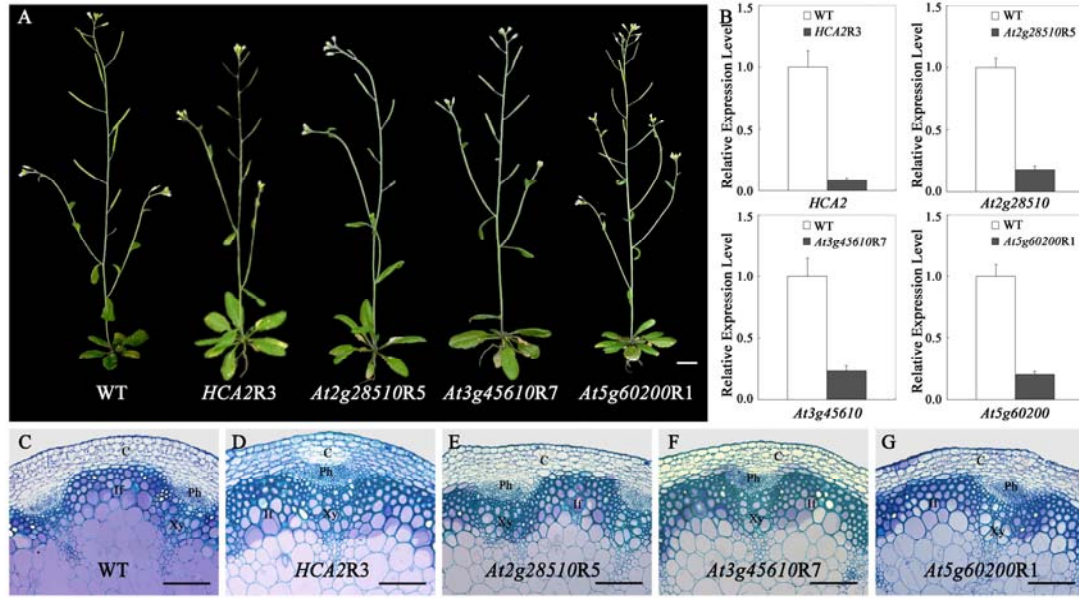

**Supplemental Figure 2. RNAi transgenic lines of *HCA2* and its homologous genes did not display obvious vascular tissue-associated phenotypes.**

(A) Six-week-old RNAi transgenic plants of *HCA2* or its homologous genes are shown.

(B) Corresponding genes in WT and their respective RNAi lines were examined by quantitative RT-PCR analysis. The expression levels of each gene in WT are set to 1.0 and error bars represent SD of three biological replicates.

(C-G) Resin-embedded transverse sections of the basal part of inflorescence stems from WT (C), *HCA2R3* (D), *At2g28510R5* (E), *At3g45610R7* (F) and *At5g60200R1* (G) plants.

C, cortex; If, interfascicular fibers; Ph, phloem; Xy, xylem.

Scale bars represent 1 cm (A) or 100 $\mu$ m (C-G).

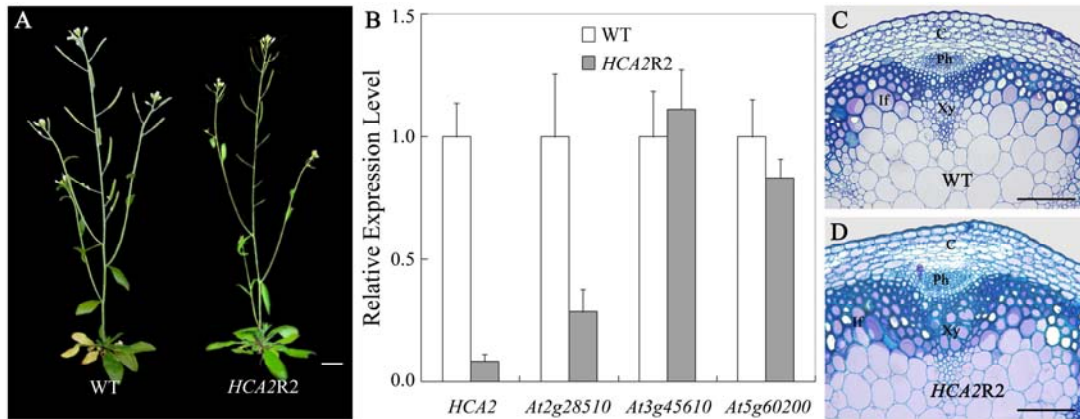

**Supplemental Figure 3. The expression of *HCA2* and one of its homologous genes was reduced in one *HCA2* RNAi transgenic line.**

(A) Six-week-old WT and *HCA2* RNAi transgenic plants are shown.

(B) Expression of *HCA2* and its homologous genes in WT and one of the *HCA2* RNAi lines was examined by quantitative RT-PCR analysis. The expression levels of each gene in WT are set to 1.0 and error bars represent SD of three biological replicates.

(C-D) Resin-embedded transverse sections of the basal part of inflorescence stems from WT (C) and *HCA2R2* (D) plants.

C, cortex; If, interfascicular fibers; Ph, phloem; Xy, xylem.

Scale bars represent 1 cm (A) or 100  $\mu$ m (C-D).

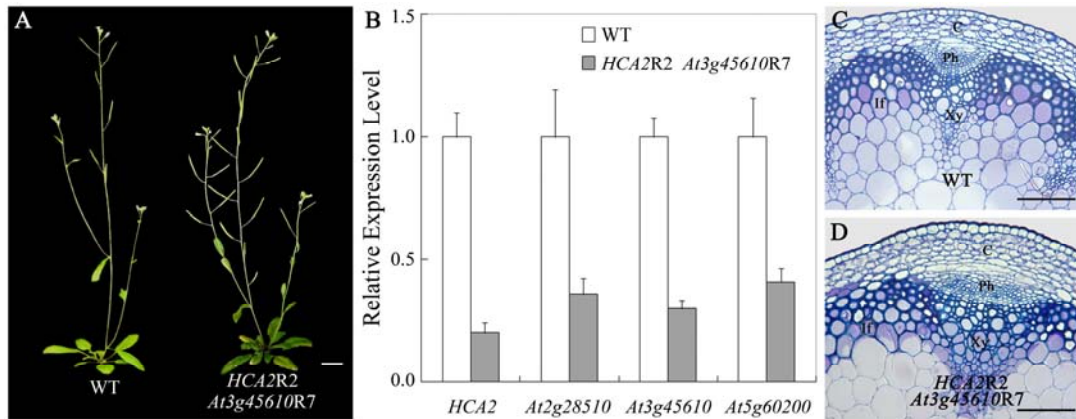

**Supplemental Figure 4. *HCA2* and its homologous genes were all down-regulated in the double RNAi transgenic line and led to no obvious phenotype.**

(A) Six-week-old WT and double RNAi transgenic plants are shown.

(B) Expression of *HCA2* and its homologous genes in WT and double RNAi lines was examined by quantitative RT-PCR analysis. The expression levels of each gene in WT are set to 1.0 and error bars represent SD of three biological replicates.

(C-D) Resin-embedded transverse sections of the basal part of inflorescence stems from WT (C) and double RNAi transgenic plant (D).

C, cortex; If, interfascicular fibers; Ph, phloem; Xy, xylem.

Scale bars represent 1 cm (A) or 100 μm (C-D).

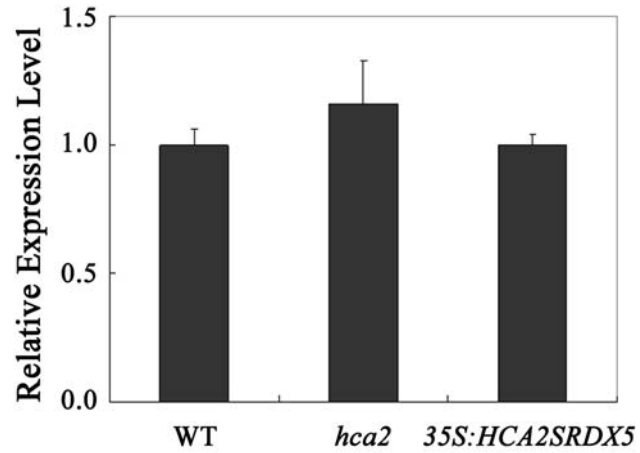

**Supplemental Figure 5. *COV1* is not regulated by *HCA2***

Expression of *COV1* in WT, *hca2* and *35S:HCA2SRDX5* was examined by quantitative RT-PCR analysis. The expression levels of *COV1* in WT are set to 1.0 and error bars represent SD of three biological replicates.

---

**Supplemental Table 1. Primer information for genes used in this study**

---

|             |                                           |
|-------------|-------------------------------------------|
| HCA2-1      | 5'-ATG GGT CTC ACT TCT CTT CAA -3'        |
| HCA2-2      | 5'-TCA AAC CAA GGA GTT TGT TTT -3'        |
| HCA2NS      | 5'-AAC CAA GGA GTT TGT TTT AGT G-3'       |
| At5g62950-1 | 5'-ATG AAA ATA GTC AAG GCA AAT GCA G -3'  |
| At5g62950-2 | 5'-TCA CGA CTG TTC ACC ATT CTC TGT -3'    |
| ProHCA2-1   | 5'-TCG TCC TCC ACT TTC CAA TA-3'          |
| ProHCA2-2   | 5'-GAG ACC CAT TTT GTG TTC TGT AT-3'      |
| HCA2RNAi-1  | 5'-GGG AGT GAA CAA TGA CAA CCT G-3'       |
| HCA2RNAi-2  | 5'-ATT CCA CGA CGA ACC TAA ACC-3'         |
| HCA2a-2     | 5'-GGA GGA ATT AGA GGA AGA TGG-3'         |
| HCA2b-1     | 5'-TCC TCC ACT TCT TCC GGC A-3'           |
| HCA2b-2     | 5'-GAA ATC AAT AGG TCT AGG GCT CT-3'      |
| HCA2c-1     | 5'-TTG GAC AGT AAG TTT GAT CTC A-3'       |
| YFP-1       | 5'-ATG GTG AGC AAG GGC GAG GAG C-3'       |
| YFP-2       | 5'-GCT TTA CTT GTA CAG CTC GTC CAT GC-3'  |
| YFPNS       | 5'-CTT GTA CAG CTC GTC CAT GCC GA-3'      |
| ProATHB8-1  | 5'-CAT GTG CCC GAT ACT CAA TTC TA-3'      |
| ProATHB8-2  | 5'-GTT GTC CAT ATT GTG ACT ATT ATT GCT-3' |
| ProSUC2-1   | 5'-ACG CAA ACT AAC TAC AAC CTT CTT-3'     |
| ProSUC2-2   | 5'-CTC CAT TGG ATG GCT GAC C-3'           |
| APL-1       | 5'-ACC AAG TCC TCG ACC ATC ACA-3'         |
| APL-2       | 5'-CTC CGA CAA AGA ATC CAA ATC C-3'       |
| RTM1-1      | 5'-ATT GTA AAC TGG GAC GAA GGA T-3'       |
| RTM1-2      | 5'-CGT ACT CGC TAG TGT TGG TAT TG-3'      |
| AHA3-1      | 5'-GCT GGT ATG GAT GTT CTG TGC-3'         |
| AHA3-2      | 5'-GGT TCG CTT ATC AAC TGG ATT-3'         |
| ANT-1       | 5'-GAT GTA GCA GCA ATT AAG TTC CG-3'      |

---

---

|                 |                                                                                                                   |
|-----------------|-------------------------------------------------------------------------------------------------------------------|
| ANT-2           | 5'-GAG CGG TTT GGT CTT CAG TAT T-3'                                                                               |
| EXPA9-1         | 5'-TGA TCT CGC TAT GCC TAT GTT T-3'                                                                               |
| EXPA9-2         | 5'-TGA CCA GCA CCA AGT TGA AGT A-3'                                                                               |
| IRX1-1          | 5'-CAT CCC AAC GCT ATC AAA CCT A-3'                                                                               |
| IRX1-2          | 5'-GCT GAG ACA CCT CCA ATA ACC C-3'                                                                               |
| IRX5-1          | 5'-TCT GGG TGA TTG GCG GTG-3'                                                                                     |
| IRX5-2          | 5'-GTC GGA GGG ATG AGA AGG GT-3'                                                                                  |
| At2g28510-1     | 5'-AAG ATG GCT TCT ACA TTG GGG-3'                                                                                 |
| At2g28510-2     | 5'-CCA GAA CAC CTT GCT AGG ATT C-3'                                                                               |
| At3g45610-1     | 5'-GGT ATG CGT TTG GAA ATG GTG-3'                                                                                 |
| At3g45610-2     | 5'-CTC TCC CTG AAT CAA TCT GAT CAA-3'                                                                             |
| At5g60200-1     | 5'-GGT TTC ATT CAG AAC TCG GTA-3'                                                                                 |
| At5g60200-2     | 5'-TGG AAA TCC CCA TAA GAC TC-3'                                                                                  |
| At2g28510RNAi-1 | 5'-CTC CAA AAG CAT CAT TTA TCC T-3'                                                                               |
| At2g28510RNAi-2 | 5'-CAA GAT GAA ACC ATC CCA TTC-3'                                                                                 |
| At3g45610RNAi-1 | 5'-GAT GGA GCT TGG GTT AGC ATA-3'                                                                                 |
| At3g45610RNAi-2 | 5'-GCA CCA GTA TTA ATG TAG TTG ACA GT-3'                                                                          |
| At5g60200RNAi-1 | 5'-ATC TGA GCT TAG CCT TTG CCT-3'                                                                                 |
| At5g60200RNAi-2 | 5'-CAA TCT GAT CTA CAT GAC CAC CA-3'                                                                              |
| COV1-1          | 5'-CCG AGG AGG AAC TTT GCT G-3'                                                                                   |
| COV1-2          | 5'-CAC CCG AAA CAA CAA TCT CAA-3'                                                                                 |
| SRDX-1          | 5'-CGG <u>ACT AGT</u> CTG GAT CTG GAT CTA GAA CTC CGT TTG<br>GGT TTC GCT TAG CTA GTG TTA <u>ACG CTA GCG</u> AG-3' |
| SRDX-2          | 5'-CTC <u>GCT AGC</u> GTT AAC ACT AGC TAA GCG AAA CCC<br>AAA CGG AGT TCT AGA TCC AGA TCC AGA <u>CTA GTC</u> CG-3' |

---
